# 1 Bacterial cellulose spheroids as building blocks for 2D and 3D engineered 2 living materials

3 Joaquin Caro-Astorga<sup>1,2</sup>, Kenneth T. Walker<sup>1,2</sup>, Tom Ellis<sup>1,2\*</sup>.

4  
5 <sup>1</sup> Department of Bioengineering, Imperial College London, London, SW7 2AZ, UK,

6 <sup>2</sup> Imperial College Centre for Synthetic Biology, Imperial College London, London, SW7 2AZ, UK,

7 \* To whom correspondence may be addressed. Email: [t.ellis@imperial.ac.uk](mailto:t.ellis@imperial.ac.uk)

## 8 9 Abstract

10 Engineered living materials (ELMs) based on bacterial cellulose (BC) offer a promising avenue for  
11 cheap-to-produce materials that can be programmed with genetically encoded functionalities. Here  
12 we explore how ELMs can be fabricated from millimetre-scale balls of cellulose occasionally  
13 produced by *Acetobacteriaceae* species, which we call BC spheroids. We define a reproducible  
14 protocol to produce BC spheroids and demonstrate their potential for use as building blocks to grow  
15 ELMs in 2D and 3D shapes. These BC spheroids can be genetically functionalized and used as the  
16 method to make and grow patterned BC-based ELMs to design. We further demonstrate the use of  
17 BC spheroids for the repair and regeneration of BC materials, and measure the survival of the BC-  
18 producing bacteria in the material over time. This work forwards our understanding of BC spheroid  
19 formation and showcases their potential for creating and repairing engineered living materials.

## 20 21 Introduction

22 Engineered living materials (ELMs) are those containing cells on or within the material that play a  
23 role in its functionalization or can produce the material itself<sup>1,2</sup>. Bacterial cellulose (BC) is a  
24 carbohydrate polymer produced by many bacterial species as a structural element of their biofilm  
25 and offers excellent opportunities for developing new ELMs<sup>3</sup>. The BC materials produced by several  
26 *Acetobacteriaceae* species are of particular interest as these are quickly and cheaply made as pellicles  
27 - a large mass of thick BC - when the cells are grown in static rich media<sup>4,5</sup>. Bacterial cellulose  
28 inherently has attractive mechanical properties and crystallinity, has a high water-retention capacity  
29 and is ultra-pure compared to plant cellulose<sup>6,7</sup>. These outstanding properties of BC make it an  
30 excellent candidate for developing new materials with improved technical and environmental  
31 benefits. In the last decade, progress in understanding and producing BC has now led to its use in a  
32 broad range of applications, including products used in textiles, cosmetics, healthcare, audio-visual  
33 technology and architecture<sup>8-11</sup>. Most of these applications use sterile, purified BC as a bulk  
34 specialised material, however bacterial cellulose has also shown promise as an ELM<sup>12,13</sup>. In one  
35 recent example, incorporating *Bacillus subtilis* cells into BC-based wound dressings helped to  
36 prevent wound infections by blocking the growth of several pathogenic bacteria<sup>14</sup>.

37 Two desirable features of ELMs not routinely seen in normal materials are regeneration in response  
38 to damage, and modular design with patterned functionalities. Easy and cheap repair of damaged  
39 materials (or their automatic regeneration) is an important consideration for the sustainability of all  
40 new materials<sup>15</sup>. BC offers excellent opportunities in this regard, because the bacteria trapped in

41 the grown material have the potential to regenerate it by further growth and cellulose production  
42 in the future. Just by providing nutrients, water and oxygen, the bacteria in theory can keep growing  
43 and seal gaps and tears when they arise, so long as the material has not been sterilised after growth.  
44 For patterned functionalities, this can also theoretically be achieved with BC-based materials by  
45 growing these from genetically engineered cells programmed<sup>3</sup>. However, another possibility to  
46 tackle this problem is to use modular ELM building blocks and pattern these physically to make  
47 larger materials. Such a ‘building block’ approach to novel materials has been taken before in  
48 nanotechnology to increase the complexity of materials and to facilitate industrial scaling of  
49 complex pieces<sup>16</sup>. Modular BC-based building blocks have not been explored before in an ELM  
50 context, but BC and in particular its rapid production from living cells within the material structure,  
51 offer an excellent opportunity to tackle this challenge.

52 Past work has shown several solutions for building BC into shapes other than the standard flat  
53 pellicles. Growing BC in hyper-hydrophobic moulds have allowed researchers to create a versatile  
54 range of three dimensional (3D) shapes with high accuracy<sup>17,18</sup>. However, moulds are limited in what  
55 they can achieve and typically work just for growing one material at a time. Creating patterns of  
56 functionalised BC grown from several different cell types would prove difficult with this approach,  
57 and so limits its use for creating 3D BC-based ELMs. 3D-printing of cells with semi-solid growth  
58 support materials is more promising in terms of creating 3D BC-based ELMs incorporating multiple  
59 strains in patterns<sup>19</sup>. However, the additive manufacturing approach relies on specialised equipment  
60 and requires washing the printed matrix to obtain the final shape. A building-block approach where  
61 modular units grow and self-connect into 3D shapes would be less cumbersome.

62 Here, we introduce the concept of using a building block approach to make 3D BC-based ELMs. This  
63 is achieved by growing and utilising BC ‘spheroids’ - millimetre-scale spheres of actively growing BC  
64 that have been observed in prior work. Growth of BC spheroids has remained poorly-understood  
65 and is typically characterised as strain-dependent or inconsistently produced<sup>20</sup>. Here, we now define  
66 a reproducible method to produce BC spheroids from the bacterial strain *K. rhaeticus* iGEM. We use  
67 these BC spheroids as building blocks to build complex 3D shapes and to create mosaic patterns  
68 made of spheroids containing genetically functionalized bacteria that impart fluorescence. We  
69 further demonstrate that spheroid building blocks can be used to regenerate damaged BC materials,  
70 growing and interweaving with an existing BC piece.

71

## 72 **Methods**

### 73 *Strains, culture conditions and BC pellicle growth.*

74 The *Acetobacteriaceae* strain used in this work was *Komagataeibacter rhaeticus* iGEM. The wild-type  
75 version of this strain was tagged with green and red fluorescence by transformation with the  
76 plasmid KTK\_124 and KTK\_182, These plasmids expresses superfolder green fluorescent protein  
77 (sfGFP) and red fluorescent protein from the J23104 constitutive promoter. They were constructed  
78 by Golden Gate assembly modifying the BioBrick compatible vector pEMpty (previously  
79 pSEVA331Bb; *E. coli*-*K. rhaeticus* expression vector, ori-pBRR1 origin of replication, chloramphenicol  
80 resistant)<sup>21</sup> Bacteria were transformed by electroporation using the *E. coli* protocol as described in  
81 Florea *et al*<sup>21</sup>.

82 Pre-cultures of *K. rhaeticus* were prepared by taking cells from -80°C stocks and growing in 50 ml  
83 tubes with 10 ml of Hestrin and Schramm (HS) media (peptone 5 g/L, yeast extract 5 g/L, 2.7 g/L  
84 Na<sub>2</sub>HPO<sub>4</sub>, 1.5 g/L citric acid, 2% glucose, 2% cellulase from *Trichoderma reesei* [Sigma-Aldrich]) in

85 shaking conditions at 250 rpm/min and at 30°C for 3 days. 2 x HS media was used for spheroid  
86 production tests and was prepared by doubling the concentrations of peptone and yeast extract.

87 To grow pellicles, pre-cultures were centrifuged at 7000 g for 3 min, cells were then resuspended in  
88 10 ml of HS without cellulase. This process was then repeated. The suspension was diluted 1 in 100  
89 to grow pellicles, growing in shallow containers with 200 ml of HS without cellulase, supplemented  
90 with 1% ethanol and incubated at 30°C for several days. To grow cellulose spheroids, the suspension  
91 was diluted 1 in 1000 in 3 ml of HS without ethanol, in 15 ml tubes, in shaking conditions at 250  
92 rpm/min and 30°C for 3 days.

93

#### 94 *Bacterial cellulose synthesis time-lapse*

95 A frozen glycerol stock of *K. rhaeticus* was used to inoculate 5 mL of HS media containing 2% glucose.  
96 The culture was incubated static for 7 days at 30°C until a pellicle formed. To prepare the  
97 microfluidic plate, 50 µL of culture from underneath the pellicle was removed and placed into the  
98 inlet well of a B04A CellASIC ONIX plate (Merck). The plate was placed onto a fluorescence  
99 microscope (Nikon Eclipse Ti inverted microscope) within a chamber heated to 30°C, and cells were  
100 fed with a continuous flow at 1 Psi of HS media containing 2% glucose and 0.001% Fluorescence  
101 Brighter 28 (Sigma-Aldrich). After 24 hours, growing cells were identified and a time-lapse was  
102 started using the bright field and DAPI channels, and images were taken every 2 minutes for 2  
103 hours.

104

#### 105 *3D structures and fluorescence*

106 Spheroids from day 3 cultures of both wild-type and sfGFP-tagged strains were collected by filtering  
107 the culture with filter paper in sterile conditions. The spheroids were seeded in the desired shape  
108 with the help of a pipette tip and then incubated for 4 days at 30°C. To create patterns, spheroids  
109 were taken one-by-one using sterile pipette tips and placed together in the desired positions.

110 Pellicles repaired with fluorescent spheroids and spheroid patterns made with fluorescently tagged  
111 cells were imaged with an Amersham Typhoon Scanner, using 10 µm resolution. A far-blue light gel  
112 transilluminator with amber filter was used to image spheroids produced by sfGFP-tagged cells.

113

#### 114 *Pellicle repair*

115 A 0.5 cm hole puncture tool (Jenley hollow leather punch) was used to create holes in bacterial  
116 cellulose pellicles. For repair using spheroids, spheres from day 3 cultures were filtered with filter  
117 paper in sterile conditions to separate them from the liquid culture. The spheroids were placed in  
118 the puncture holes and 50 µl of HS supplemented with 2% glucose was dropped over the spheroids.  
119 2 ml of HS was then added into the surrounding container of the pellicle to maintain it in a hydrated  
120 state. The pellicles were incubated in static conditions for 10 days at 30°C before imaging. In  
121 unsuccessful attempts of pellicle repair the following were used i) fragments of biofilm found  
122 adhered to the wall of a flask after 4 days in shaking conditions; ii) floating clumps formed in shaking  
123 conditions from a initial culture set with high cell density ( $OD_{600} \sim 0.5$ ); iii) cellulose aggregates  
124 present in the culture medium under the pellicle; iv) a pellet of cells grown in shaking conditions  
125 with cellulase, centrifuged, washed with HS and centrifuged again; v) cells from (iv) embedded in a

126 0.3% HS agar matrix at 40°C and immediately placed in the pellicle before it solidifies; vi) a cellulose  
127 patch of slightly bigger dimensions than the hole produced in the pellicle, used to force the edges  
128 of the patch and the hole to be in close contact.

129

### 130 *Cell survival in pellicles*

131 A homogeneous suspension to grow pellicles was prepared as described above. Pellicles were grown  
132 in 96 squared deep well plates at 30°C. After 7 days, pellicles were stored in vacuum sealed plastic  
133 bags at 4°C and 23°C and also in 2 ml tubes at 23°C. Samples in triplicate were collected at each time  
134 point to assess survival. Pellicles were placed in 2 ml tubes, suspended in HS diluted 1 in 10 with 5%  
135 cellulase and incubated at 37°C for 3 h in shaking conditions to degrade the cellulose. Serial dilutions  
136 of each suspension were made, and these dilutions plated in four replicates on HS agar  
137 supplemented with 2% of glucose. After 7 days of incubation at 30°C, colonies were counted from  
138 the agar plates and colony forming units (CFUs) per cm<sup>2</sup> pellicle area was calculated.

139

## 140 **Results**

### 141 *Bacterial cellulose spheroids*

142 Bacterial cellulose (BC) spheroids have been reported in several previous works<sup>20,22,23</sup>, but how they  
143 form and why has not been fully elucidated. It has been hypothesized that spheroid formation is  
144 produced by the adhesion of bacteria to air bubbles produced in shaking media, with cellulose then  
145 grown at the bubble air-liquid interphase to form a spheroid shape<sup>24</sup>. Past experiments in our lab  
146 growing *K. rhaeticus* in shaking conditions occasionally produced spheroids. As with other BC-  
147 producing bacteria, we originally assumed that spheroid formation by *K. rhaeticus* occurred  
148 randomly, either in response to stochastic processes during shaking growth or due to mutation or  
149 another form of uncontrolled variation in cell behaviour that triggers their spontaneous production.

150 Here we set out to examine whether spheroid production by *K. rhaeticus* was indeed a random  
151 event, or one that could be reproducibly triggered. To do this, we grew *K. rhaeticus* cells with shaking  
152 at 30°C and tried combinations of more than 20 different growth variable (Supplementary Table 1).  
153 During and after growth, we visually assessed the cultures for the presence of BC spheroids and  
154 used this information to determine the key factors involved in spheroid formation and which  
155 combination of growth variables leads to reproducible growth of BC spheroids.

156 Our results indicated that the main determining factor for BC spheroid formation is the initial optical  
157 density of the culture, with more ideal spheroids seen when cultures begin at low optical densities  
158 (OD<sub>600</sub> = 0.001-0.0001) where bacteria are more likely to begin isolated from one another  
159 (Supplementary Figure 1A). The second most important factor seen in our experiments was the  
160 culture container. BC spheroids were only ever seen forming after shaking growth in 14 ml and 15  
161 ml plastic culture tubes, and never grew in any of our attempts with 50 ml tubes or with larger  
162 bottles and flasks of different sizes, regardless of the different culture volumes tested. The third  
163 factor revealed in our experiments was the culture media. The addition of 1% ethanol is known to  
164 drastically increase the BC yield when growing static pellicles<sup>25</sup>. Unexpectedly, however, we found  
165 in multiple trials with different seeding dilutions and containers that ethanol inhibits spheroid  
166 formation. The use of 2 x HS instead of normal HS media gave a higher yield in the number of

167 spheroids per tube, but the spheroids were smaller in size and less uniform (Supplementary Figure  
168 1B).

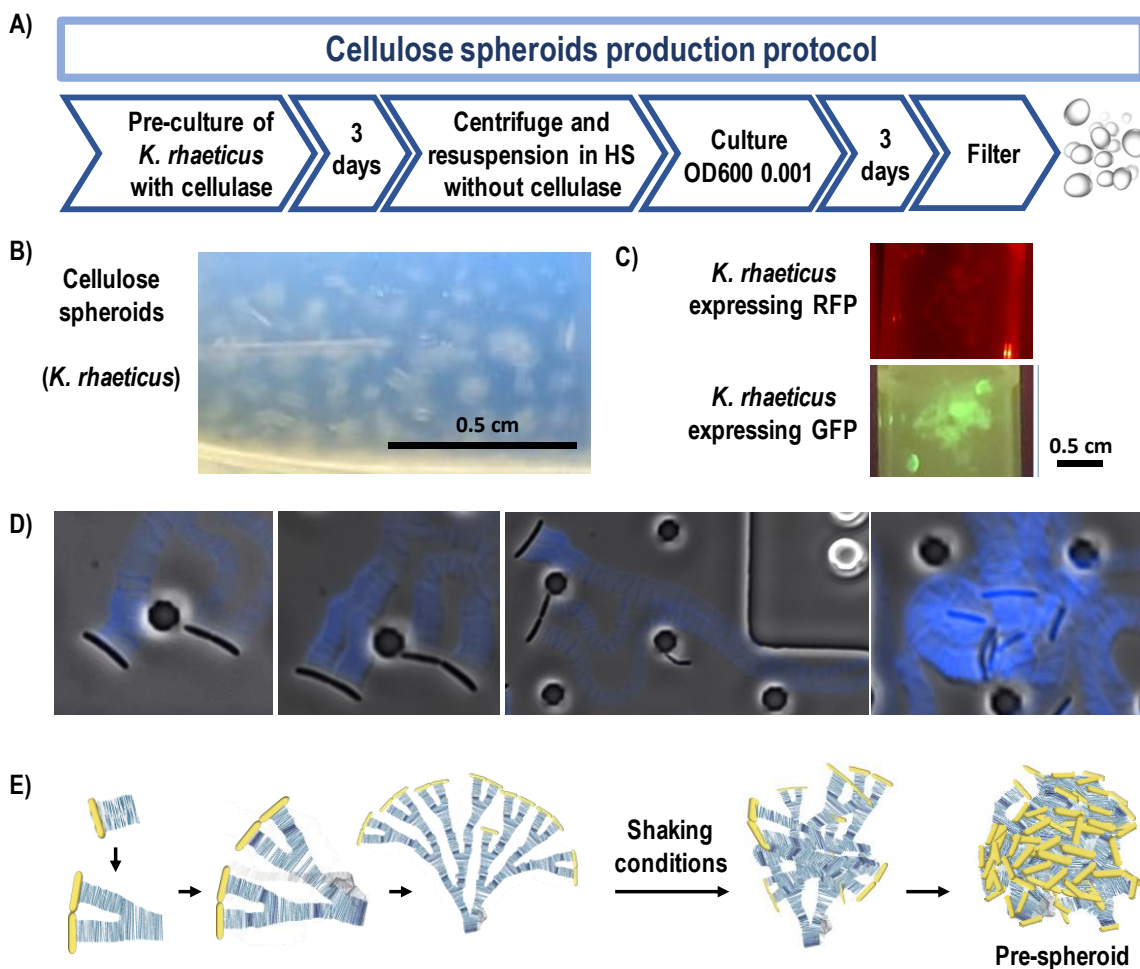

169

170 **Figure 1. Bacterial cellulose (BC) spheroids.** A) Schematic of the protocol to produce BC spheroids in  
171 shaken cultures. B) Example image of BC spheroids produced by wild type *K. rhaeticus* cells. C) Example image of BC  
172 spheroids produced by sfGFP (left) or RFP-tagged (right) *K. rhaeticus* cells. D) Microscopy images of a microfluidic growth  
173 time-lapse of *K. rhaeticus* cells growing at low density with calcofluor blue staining of cellulose. E) Schematic showing  
174 growth progression of cellulose in static and shaking conditions, hypothesised to lead BC spheroid formation.

175

176 With these three factors determined, it became possible for us to produce a protocol for reliable  
177 spheroids production (Figure 1A) in 14 ml culture tubes, yielding spheroids typically 0.2 to 1 mm in  
178 diameter (Figure 1B). We also tested if our protocol for spheroids cultivation would also work for  
179 genetically modified strains of *K. rhaeticus* containing plasmids expressing transgenes. We observed  
180 reliable growth of green fluorescent spheroids from *K. rhaeticus* expressing sfGFP and red  
181 fluorescent protein (RFP) expressed from a plasmid (Figure 1C).

182 In order to observe how BC is produced by our bacteria, we performed microfluidic time-lapse  
183 culture experiments with calcofluor added to stain nascent cellulose production (Supplementary  
184 Video 1). We observed band-like growth of BC chains coming from one side of the bacteria  
185 longitudinal axis, producing branches of cellulose as the cells divide (Figure 1C). In static culture, this

186 event is responsible for the formation of layers of cellulose growing into pellicles. However, when  
 187 perturbed by shaking, the branches collapse on themselves, entangling the BC bands while the  
 188 chains continue growing and cells dividing. Although conditions in the microfluidic chamber do not  
 189 match those used for spheroid production in our protocol, we reason that the same processes lead  
 190 to the formation of spheroids when cultures are seeded at very low density (Figure 1D).

191

192 *Construction in 2D and 3D with BC spheroids*

193 Given their mechanism of growth, we reasoned that spheroids would continue cellulose production  
 194 at their surfaces and thus when two spheroids interact for enough time they will grow together and  
 195 fuse. This property of our spheroids would allow them to act as millimetre-scale BC-based building  
 196 blocks that could then be used to produce 2D and 3D shapes (Figure 2A). To demonstrate this  
 197 application, we designed a simple 3D shape (a podium) and a more complex 3D shape (a serrated  
 198 ring). We then manually placed spheroids in these arrangements on sterile cotton pads, with the  
 199 help of a pipette tip. After 4 days of incubation at 30°C, the spheroids had visibly grown and fused  
 200 together to create a continuous BC-based shape roughly matching the seeded design (Figure 2B).

201

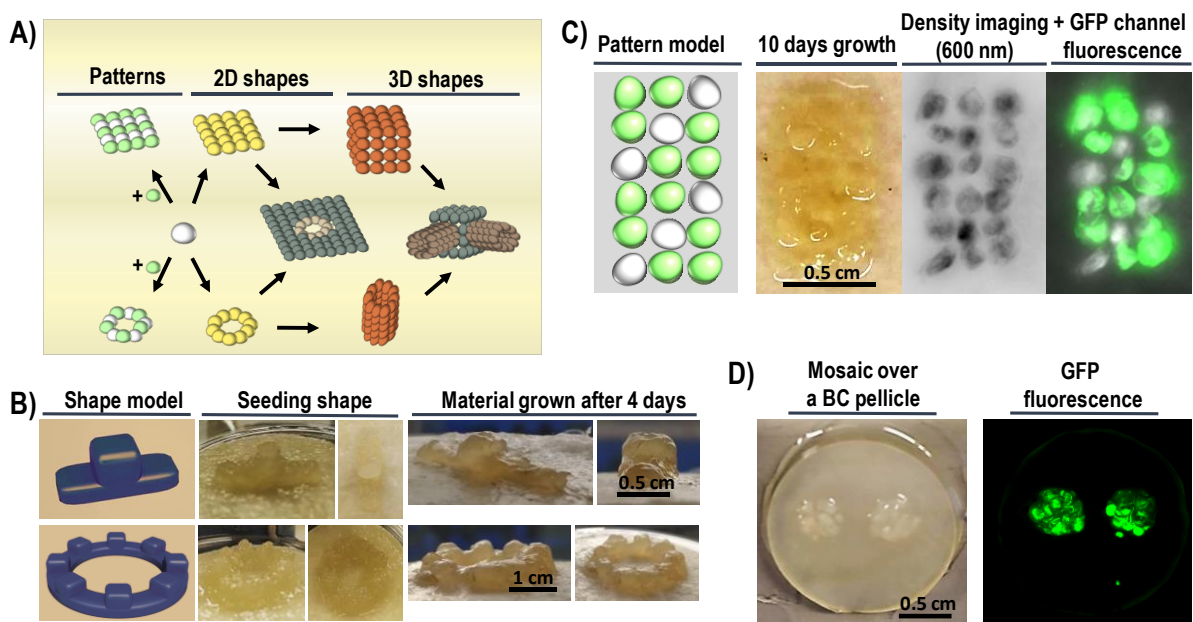

202

203 **Figure 2. BC spheroids as building blocks.** A) Schematic of potential building structures that can be created from spherical  
 204 building blocks. B) Growth of simple and complex 3D shapes constructed using BC spheroids. Model (left), spheroid  
 205 seeding (middle) and result after 4 days of growth (right). C) Patterns of functionalized BC spheroids. Model (left), pellicle  
 206 after 10 days growth (middle left), spheres imaged using 600 nm excitation laser (middle right) and merged 600 nm image  
 207 and GFP channel. E) Mosaic of sfGFP-tagged spheroids grown for 4 days at 30°C on an existing bacterial cellulose pellicle.  
 208 Pictures of the material after 10 days of growth in the visible channel (left) and green fluorescence channel (right).

209

210 The use of cellulose spheroids as building blocks opens a new opportunity to create ELMs with 2D  
 211 and 3D patterns and multifunctional properties. As *K. rhaeticus* is a non-motile bacteria, the patterns  
 212 created from spheroid seeding will not get blurred and should remain conserved. To demonstrate,  
 213 we designed and created layer of BC seeded onto filter paper with both normal BC spheroids and

214 BC spheroids made by GFP-tagged *K. rhaeticus*. We placed the fluorescent spheroids in three lines  
215 close to each other, setting a pattern to make diagonal lines of non-fluorescent spheroids within the  
216 pattern. After 10 days of incubation at 30°C, we obtained a fused pellicle conserving the fluorescent  
217 pattern of seeding, demonstrating the possibility of easily creating ELMs functionalized at the  
218 millimetre scale - the diameter of a single spheroid (Figure 2C).

219 We observed in these experiments that growth after seeding also led to the spheroid structure being  
220 adhered to the sterile filter paper support. As paper is itself predominantly cellulose, we wondered  
221 how the spheroids would behave if they were set to grow on a layer of bacterial cellulose. To  
222 examine this, we seeded fluorescent spheroids on a normal *K. rhaeticus* pellicle produced from static  
223 growth. After 4 days of incubation at 30°C, the spheroids were completely fused to the base pellicle,  
224 revealing that a BC layer provides an excellent frame within which to set spheroids in patterns.  
225 Fluorescence was localized exactly in the area of seeding (Figure 2D).

226

### 227 *Bacterial cellulose regeneration by BC spheroids*

228 Given the strong interest in using BC as a basis for ELMs, there is a need to identify methods to  
229 repair or regenerate a BC-based material when and if they are damaged. The efficient fusing of  
230 spheroids into a pellicle as seen in pattern formation experiments (Figure 2D) suggests that  
231 spheroids could provide a method for pellicle damage repair (Figure 3A). To investigate this, we  
232 established a repair assay of BC pellicles BC using a hole punch to damage the material. We first  
233 assessed whether just the addition of HS media and further incubation for 7 days in static aerated  
234 conditions would result in regrowth of BC in the hole wound of a punctured fresh BC pellicle.  
235 Although a thin BC layer did grow over the hole, the new thin pellicle layer was poorly adhered to  
236 the original one below it (Supplementary Figure 2A). We considered that the poor adherence was a  
237 result of adding too much liquid growth media, inducing the formation of a new BC layer only at the  
238 air liquid interface and not well-adhered to the original pellicle. Thus, we decided to just add a few  
239 drops of new HS media in the holes with and without also adding the circles of cellulose produced  
240 by the hole puncture (Supplementary Figure 2B, 'Controls'). After 7 days incubation, this still failed  
241 to show stable wound repair.

242 This failure to repair may be explained by the fact that BC pellicles grow anisotropically; producing  
243 new cellulose predominantly in the horizontal axis at the top layer, building the pellicle from the  
244 bottom up by stacking cellulose layers one over the other. In contrast, spheroids grow BC  
245 isotropically, producing it in every radial direction (Figure 3A). We have observed that the incubation  
246 of two stacked pellicles does not produce regrowth and their fusion, so next we looked to see how  
247 spheroids can behave as a repair material. After placing freshly-grown spheroids into the puncture  
248 hole at high density (Figure 3B) and incubating for 6 days to allow for cellulose growth, we saw  
249 excellent repair that was not only stable but also restored the consistency and appearance of the  
250 top layer of the material (Figure 3C). We also compared this repair method to many other options  
251 for repair where growing cellulose-producing bacteria or fragments of pellicles in different forms  
252 are placed into the wound holes and allowed to grow (Methods and Supplementary Figure 2B).  
253 Repair quality was assessed by holding the pellicle edges with tweezers and pulling. Only the pellicle  
254 restored with cellulose spheroids maintained the continuity of the pellicle with high enough quality  
255 to be stable upon further manipulation (Figure 3C). We speculate that this is due the growth axis of  
256 the materials used for restoration.

257 Notably, the BC layer repaired with spheroids did not look different to an unpunctured pellicle once  
258 the repaired pellicle was lifted. This suggests that there is no change in the diffraction angle of the  
259 light between the original BC and newly synthesized cellulose from the spheroids, perhaps due to  
260 the spheroids producing similar cellulose that infiltrates and networks with the existing BC material  
261 (Figure 3C). To further investigate how spheroids interlink with a BC pellicle, we performed a further  
262 repair assay experiment, but now refilling the wound holes with fluorescent spheroids produced by  
263 GFP-tagged bacteria. After 10 days, the holes were repaired, and fluorescence could be observed  
264 within the hole seeded with spheroids and also at a weaker level in the surrounding material of the  
265 pellicle (Figure 3D). This reveals that bacteria spread into the local region of the damaged cellulose  
266 sheet into which they are placed.

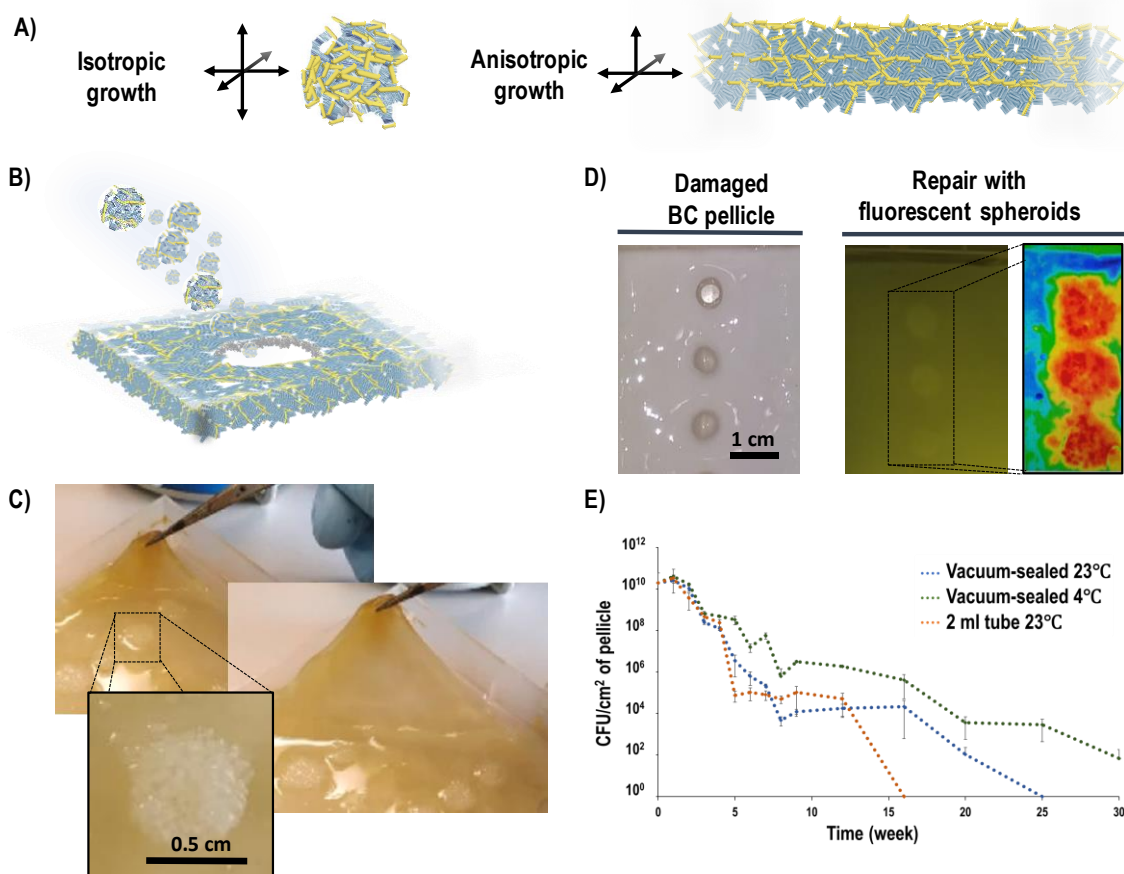

267

268 **Figure 3. Repair of BC materials using BC spheroids.** A) Illustration of the BC growth axis of spheroids compared to those  
269 seen in pellicles. B) Schematic of the regeneration strategy of repair by seeding puncture holes with spheroids. C) Result  
270 of the regeneration of a bulk BC pellicle obtained using BC spheroids. Light passing through the regenerated material layer  
271 does not suffer diffraction, indicating recovery of the bacterial cellulose macrostructure. D) Result of the regeneration of  
272 a sterilised BC pellicle (left) using spheroids of *K. rhaeticus* cells tagged with sfGFP (right) and incubated for 10 days. The  
273 heat map indicates intensity of green fluorescence, revealing the greatest intensity inside the seeded spheroids and  
274 weaker but measurable signal corresponding to the colonization of the local region of pellicle. E) Graph of *K. rhaeticus* cell  
275 survival over time from within BC pellicles stored in vacuum-sealed plastic bags or in 2 ml tubes at 4 and 23°C. Plotted  
276 values are the mean of 3 biological replicates of 4 technical replicates each.

277

278 In parallel to studying repair using BC spheroids, we also investigated how long unsterilized BC-  
279 based materials maintain the population of *K. rhaeticus* cells within them. This was assessed in order



280 to understand whether BC spheroids could be made in bulk in advance, stored and then used for  
281 construction or repair when needed. Assessing cell survival within the spheroids proved difficult due  
282 to the small size of spheroids and irregular shapes giving variable volumes and thus cell counts.  
283 Therefore, we instead used small BC pellicles grown in 96 well microplates as an equivalent material.  
284 After growth of this BC material, the small pellicle samples were immediately stored in either  
285 vacuum-sealed bags (stored at 4°C and 23°C) or in 2 ml tubes at 23°C. Then over a period of time,  
286 the samples were removed from storage, digested with cellulase and grown on solid agar plates in  
287 order to determine cell number per sample by calculating colony forming units. This revealed that  
288 the number of viable cells in the material decreased rapidly in the first 3 weeks for all three storage  
289 methods tested (Figure 3E). However viable cells were still recovered beyond 12 weeks in all cases,  
290 and when the BC was vacuum-sealed and stored at 4°C, cells were still recoverable beyond 6  
291 months.

292

## 293 Discussion

294 In the research presented here, we have uncovered the basic principles of BC spheroids formation  
295 from growing *K. rhaeticus* iGEM cells and have determined a reproducible protocol for their  
296 production. Previous research on BC spheroids has suggested that their production is strain  
297 dependent with some strains capable of their production but others not. For example, the *G. xylinus*  
298 JCM 9730 strain (ATCC 700178) was shown to produce spheroids but *G. xylinus* NCIMB strain (ATCC  
299 23769) did not<sup>20</sup>. Here we show that BC spheroids can be routinely made from *K. rhaeticus* iGEM  
300 and that a by having a consistent low number of cells to begin the culture is critical. It may be the  
301 case that all BC-producing bacteria can produce BC spheroids if seeded at the correct density. We  
302 note that the protocol of the aforementioned work did not measure the cell density of the bacteria  
303 inoculum before beginning culturing for BC spheroid production.

304 While previous work has hypothesised that attachment and growth around air bubbles triggers  
305 spheroid production<sup>25</sup>, our data from microfluidic time-lapse imaging offer a new insight, showing  
306 that there can be an entangling process of cells and cellulose chains during the early stages of culture  
307 growth. As uncovered here, BC spheroid formation from *K. rhaeticus* iGEM strongly depends on the  
308 bacteria concentration used to seed the culture, with low culture density being required. When the  
309 shaking culture starts at high density, we always obtain amorphous aggregates of cellulose that  
310 range from a very fibrous mass to single large piece of rounded cellulose. This tallies with previous  
311 work with *G. xylinus* JCM 9730 that showed that differences in the number and size of spheroids  
312 depended on the volume used to inoculate the culture<sup>26</sup>. The volume and shape of the container  
313 also affected spheroid formation, likely due to how the motion of the growth media is affected and  
314 how this changes the entangling process and air bubble formation.

315 Our work also demonstrated the potential for BC spheroids to be used as building blocks to create  
316 2D and 3D shapes and create patterns that could find use as functionalized ELMs. The building block  
317 approach opens a myriad of applications, especially when considering the possibility of using BC  
318 spheroids grown from genetically reprogrammed cells that perform other tasks. Through synthetic  
319 biology, bacteria can be made to sense a wide variety of biological, chemical and physical inputs and  
320 also to signal to one another in ways analogous to electric circuitry<sup>27-29</sup>. Different functionalized  
321 spheroids could be used to create 2D and 3D patterns that compute environmental information, or  
322 even patterned materials that display anchor proteins to attract mammalian cells or cell

323 differentiation signals. Such a material could for example be used to seed and grow complex  
324 mammalian tissues like skin or cartilage in defined patterns and layers.

325 BC spheroids also offered the best solution to BC material repair in the research shown here.  
326 Regeneration of a damaged BC pellicle and restoration of its continuity was seen in only a few days  
327 of growth with seeded spheroids. Our best results were obtained with thin pellicles. For thicker  
328 pellicles, we observed that restoration was superficial, and we speculate that this is due to the poor  
329 penetration of oxygen to the spheroids in deeper layers. To solve this problem, we now perform a  
330 double incubation, turning over the pellicle after a few days to also let the material to heal on the  
331 other surface. BC spheroids function as a successful vector to seed bacteria for BC repair and our  
332 data suggest they may be able to be stored for several months prior to use, although likely with  
333 reduced repair capacity over time.

334 For creating small 3D shapes, BC spheroids building blocks are limited by their millimetre size and  
335 the low precision of fabrication by hand. For making smaller or more precise BC-based ELM shapes  
336 it may be more convenient the use 3D printing methods developed for bacterial cultures, such as  
337 the FLINK method where a non-living gel matrix that harbours the bacteria is printed into the desired  
338 shape and the cells then grow and produce within this<sup>19</sup>. 3D printing allows the production of  
339 functionalized ELMs using different bacteria, but its accuracy is limited by the width of the extrusion  
340 printing head, which itself is limited by the high viscosity of the printed gel. A possible solution is a  
341 hybrid approach where a 3D printer is programmed to precisely dispense BC spheroids, and the size  
342 of these spheroids is reduced by harvesting them a day earlier than in the protocol given here.

343

#### 344 **References**

- 345 1. Nguyen, P. Q., Courchesne, N.-M. D., Duraj-Thatte, A., Praveschotinunt, P. & Joshi, N. S.  
346 Engineered Living Materials: Prospects and Challenges for Using Biological Systems to Direct the  
347 Assembly of Smart Materials. *Adv. Mater.* **30**, 1704847 (2018).
- 348 2. Chen, A. Y., Zhong, C. & Lu, T. K. Engineering Living Functional Materials. *ACS Synth. Biol.* **4**, 8–11  
349 (2015).
- 350 3. Walker, K. T., Goosens, V. J., Das, A., Graham, A. E. & Ellis, T. Engineered cell-to-cell signalling  
351 within growing bacterial cellulose pellicles. *Microb. Biotechnol.* **12**, 611–619 (2019).
- 352 4. Limoli, D. H., Jones, C. J. & Wozniak, D. J. Bacterial Extracellular Polysaccharides in Biofilm  
353 Formation and Function. *Microbiol. Spectr.* **3**, (2015).
- 354 5. Augimeri, R. V., Varley, A. J. & Strap, J. L. Establishing a Role for Bacterial Cellulose in  
355 Environmental Interactions: Lessons Learned from Diverse Biofilm-Producing Proteobacteria.  
356 *Front. Microbiol.* **6**, 1282 (2015).
- 357 6. Reiniati, I., Hrymak, A. N. & Margaritis, A. Recent developments in the production and  
358 applications of bacterial cellulose fibers and nanocrystals. *Crit. Rev. Biotechnol.* **37**, 510–524  
359 (2017).
- 360 7. Fijałkowski, K. *et al.* Increased water content in bacterial cellulose synthesized under rotating  
361 magnetic fields. *Electromagn. Biol. Med.* **36**, 192–201 (2017).
- 362 8. Choi, S. M. & Shin, E. J. The Nanofication and Functionalization of Bacterial Cellulose and Its  
363 Applications. *Nanomaterials* **10**, 406 (2020).
- 364 9. Gorgieva & Trček. Bacterial Cellulose: Production, Modification and Perspectives in Biomedical  
365 Applications. *Nanomaterials* **9**, 1352 (2019).

- 366 10. Gullo, M., La China, S., Falcone, P. M. & Giudici, P. Biotechnological production of cellulose  
367 by acetic acid bacteria: current state and perspectives. *Appl. Microbiol. Biotechnol.* **102**, 6885–  
368 6898 (2018).
- 369 11. Klemm, D. *et al.* Nanocelluloses as Innovative Polymers in Research and Application. in  
370 *Polysaccharides II* (ed. Klemm, D.) 49–96 (Springer, 2006). doi:10.1007/12\_097.
- 371 12. Gilbert, C. *et al.* Living materials with programmable functionalities grown from engineered  
372 microbial co-cultures. *bioRxiv* 2019.12.20.882472 (2019) doi:10.1101/2019.12.20.882472.
- 373 13. Gilbert, C. & Ellis, T. Biological Engineered Living Materials: Growing Functional Materials  
374 with Genetically Programmable Properties. *ACS Synth. Biol.* **8**, 1–15 (2019).
- 375 14. Savitskaya, I. S., Shokatayeva, D. H., Kistaubayeva, A. S., Ignatova, L. V. & Digel, I. E.  
376 Antimicrobial and wound healing properties of a bacterial cellulose based material containing  
377 *B. subtilis* cells. *Heliyon* **5**, e02592 (2019).
- 378 15. Heinrich, M. K. *et al.* Constructing living buildings: a review of relevant technologies for a  
379 novel application of biohybrid robotics. *J. R. Soc. Interface* **16**, 20190238 (2019).
- 380 16. Lombardo, D., Calandra, P., Pasqua, L. & Magazù, S. Self-assembly of Organic Nanomaterials  
381 and Biomaterials: The Bottom-Up Approach for Functional Nanostructures Formation and  
382 Advanced Applications. *Mater. Basel Switz.* **13**, (2020).
- 383 17. Laromaine, A. *et al.* Free-standing three-dimensional hollow bacterial cellulose structures  
384 with controlled geometry *via* patterned superhydrophobic–hydrophilic surfaces. *Soft Matter* **14**,  
385 3955–3962 (2018).
- 386 18. Greca, L. G., Lehtonen, J., Tardy, B. L., Guo, J. & Rojas, O. J. Biofabrication of multifunctional  
387 nanocellulosic 3D structures: a facile and customizable route. *Mater. Horiz.* **5**, 408–415 (2018).
- 388 19. Schaffner, M., Rühls, P. A., Coulter, F., Kilcher, S. & Studart, A. R. 3D printing of bacteria into  
389 functional complex materials. *Sci. Adv.* **3**, eaao6804 (2017).
- 390 20. Hu, Y. & Catchmark, J. M. Formation and characterization of spherelike bacterial cellulose  
391 particles produced by *Acetobacter xylinum* JCM 9730 strain. *Biomacromolecules* **11**, 1727–1734  
392 (2010).
- 393 21. Florea, M. *et al.* Engineering control of bacterial cellulose production using a genetic toolkit  
394 and a new cellulose-producing strain. *Proc. Natl. Acad. Sci.* **113**, E3431–E3440 (2016).
- 395 22. Gullo, M., La China, S., Petroni, G., Di Gregorio, S. & Giudici, P. Exploring K2G30 Genome: A  
396 High Bacterial Cellulose Producing Strain in Glucose and Mannitol Based Media. *Front. Microbiol.*  
397 **10**, (2019).
- 398 23. Singhsa, P., Narain, R. & Manuspiya, H. Physical structure variations of bacterial cellulose  
399 produced by different *Komagataeibacter xylinus* strains and carbon sources in static and agitated  
400 conditions. *Cellulose* **25**, 1571–1581 (2018).
- 401 24. Czaja, W., Romanovicz, D. & Brown, R. malcolm. Structural investigations of microbial  
402 cellulose produced in stationary and agitated culture. *Cellulose* **11**, 403–411 (2004).
- 403 25. Rynhajłto, M., Jacek, P., Cielecka, I., Kalinowska, H. & Bielecki, S. Effect of ethanol  
404 supplementation on the transcriptional landscape of bionanocellulose producer  
405 *Komagataeibacter xylinus* E25. *Appl. Microbiol. Biotechnol.* **103**, 6673–6688 (2019).
- 406 26. Hu, Y., Catchmark, J. M. & Vogler, E. A. Factors impacting the formation of sphere-like  
407 bacterial cellulose particles and their biocompatibility for human osteoblast growth.  
408 *Biomacromolecules* **14**, 3444–3452 (2013).
- 409 27. Ford, T. J. & Silver, P. A. Synthetic biology expands chemical control of microorganisms. *Curr.*  
410 *Opin. Chem. Biol.* **28**, 20–28 (2015).
- 411 28. Manzoni, R., Urrios, A., Velazquez-Garcia, S., de Nadal, E. & Posas, F. Synthetic biology:  
412 insights into biological computation. *Integr. Biol. Quant. Biosci. Nano Macro* **8**, 518–532 (2016).

413 29. Boo, A., Ellis, T. & Stan, G.-B. Host-aware synthetic biology. *Curr. Opin. Syst. Biol.* **14**, 66–72  
414 (2019).

415

416

417

418

#### 419 **Acknowledgements**

420 The authors wish to thank Dr Koonyang Lee, Dr Vivianne J Goosens and Mr Amritpal Singh for their  
421 help with this project at Imperial College London. We acknowledge the US Office of Naval Research  
422 Global (ONRG) and US Army CCDC DEVCOM grant W911NF-18-1-0387, and the UK Engineering and  
423 Physical Sciences Research Council (EPSRC) grant EP/N026489/1 for funding this work.
